# Supplementary material
Source: PubMed Central journal article supplement (PMC10848811)
Supplement: NIHMS1753668-supplement-Supplemental_Data_File__doc__pdf__etc__.pdf [file NIHMS1753668-supplement-Supplemental_Data_File__doc__pdf__etc__.pdf]

# Role of Resection of the Primary in Metastatic Well and Intermediate-Differentiated Neuroendocrine Tumor

## SUPPLEMENTAL DIGITAL CONTENT

**SUPPLEMENTAL TABLE 1.** Univariate and Multivariable Analyses of OS by Resection of Primary Subtypes

| Subtype<br>Resection (Yes vs No) | Univariate Analysis   |        | Multivariable Analysis |        |
|----------------------------------|-----------------------|--------|------------------------|--------|
|                                  | Hazard Ratio (95% CI) | P      | Hazard Ratio (95% CI)  | P      |
| Pancreas                         |                       |        |                        |        |
| Yes                              | 0.29 (0.19–0.43)      | <0.001 | 0.33 (0.22–0.49)       | <0.001 |
| No                               | 1 (Reference)         |        | 1 (Reference)          |        |
| Small bowel                      |                       |        |                        |        |
| Yes                              | 0.47 (0.36–0.61)      | <0.001 | 0.76 (0.50–1.16)       | 0.210  |
| No                               | 1 (Reference)         |        | 1 (Reference)          |        |
| Other                            |                       |        |                        |        |
| Yes                              | 0.39 (0.32–0.48)      | <0.001 | 0.44 (0.32–0.61)       | <0.001 |
| No                               | 1 (Reference)         |        | 1 (Reference)          |        |

### Kaplan Meier Analysis

With Number of Subjects at Risk

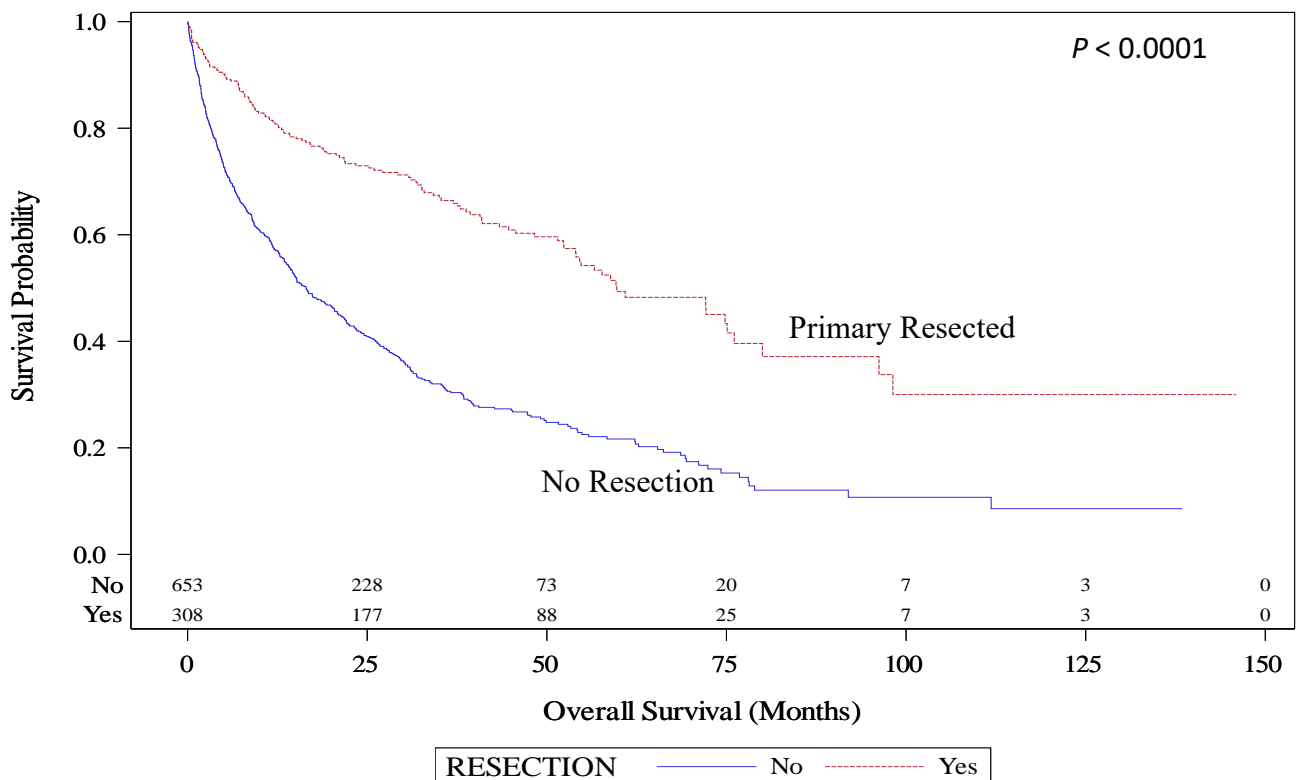

| Resection | No. of Subjects | Event     | Censored  | Median Survival (95% CI) | 12 mo Survival (95% CI) | 60 mo Survival (95% CI) |
|-----------|-----------------|-----------|-----------|--------------------------|-------------------------|-------------------------|
| No        | 653             | 471 (72%) | 182 (28%) | 16.5 (14.2–20.3)         | 57.3% (53.4%–61.1%)     | 21.7% (17.9%–25.7%)     |
| Yes       | 308             | 127 (41%) | 181 (59%) | 59.7 (54–76.1)           | 81.1% (76.2%–85.1%)     | 49.3% (41.7%–56.5%)     |

**SUPPLEMENTAL FIGURE 1.** Kaplan-Meier plot for resection stratified by primary site (rectum/colon/prostate/kidney/lung/liver/gastric and stomach).
